# Supplementary material for: Use of caprylic/capric triglyceride in the encapsulation of dementholized peppermint fragrance leading to smaller and better distributed nanocapsules
Source: Royal Society of Chemistry journal article supplement (doi:10.1039/c6ra19003k), 2016-01-01
Supplement: c6ra19003k1.pdf [file c6ra19003k1.pdf]

## Supporting Information

### Use of Caprylic/capric Triglyceride in the Encapsulation of Dementholized Peppermint Fragrance Leading to Smaller and Better Distributed Nanocapsules

Kai Ye,<sup>a</sup> Di Zhao,<sup>a</sup> Xiaodi Shi,<sup>a</sup> Xihua Lu,<sup>\*ab</sup>

#### 1. Encapsulation efficiency

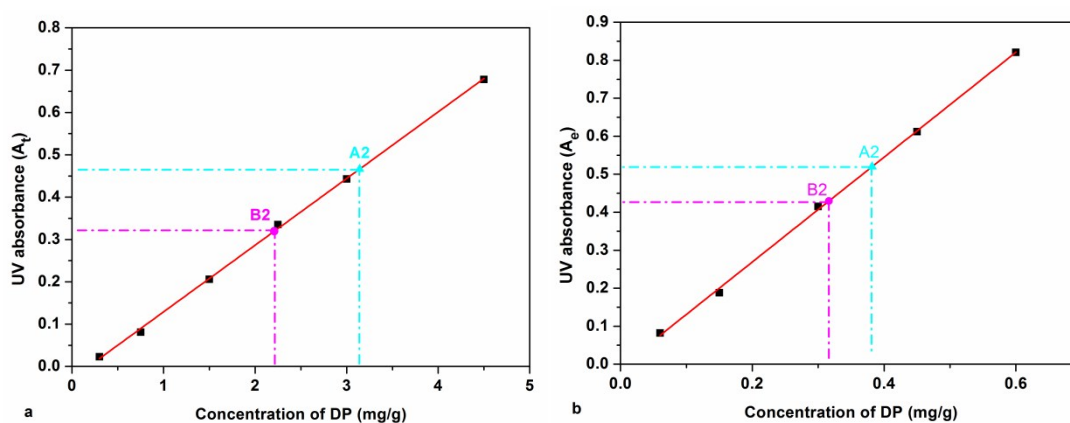

**Figure S1** (a) The relationship plot of concentration of DP in toluene with UV-vis absorbance ( $A_i$ ), (b) The relationship plot of concentration of DP in ethanol with UV-vis absorbance ( $A_e$ ).
